# Supplementary material for: The Effect of High Temperatures on Risk of Hospitalization in Northern Vietnam
Source: Research Square preprint supplement (doi:10.21203/rs.3.rs-400725/v1), 2021-04-19
Supplement: Supplementary file 1 [file 67f140157395a3175a8c057f.docx]

Dien Bien

Bac Giang

Quang Ninh

Tuyen Quang

Ha Noi

Lai Chau

Phu Tho

Supplementary Figure 1: Study provinces in northern Vietnam
